# Supplementary material for: The Effects of Grape/Grape Products on Inflammatory and Oxidative Stress Markers: Systematic Review and Meta-Analysis of Randomized Controlled Trials
Source: Hindawi journal article supplement (doi:10.1155/2024/5086541), 2024-04-16
Supplement: f1 [file 5086541.f1.docx]

**SUPPLEMENTAL MATERIALS**

The Effects of Grape/Grape Products on Inflammatory and Oxidative Stress Markers: Systematic Review and Meta-Analysis of Randomized Controlled Trials

| **Table S1.** Literature search strategy terms |
| --- |
| ***Grape related terms***  Grape [Title/Abstract] OR Grapes[Title/Abstract] OR "Vitis vinifera"[Title/Abstract] OR Raisin[Title/Abstract] OR Sultanas[Title/Abstract] OR Currant[Title/Abstract] OR "Pinot noir"[Title/Abstract] OR Muscat[Title/Abstract] OR Grapevines[Title/Abstract] OR Glera[Title/Abstract] OR Barbera[Title/Abstract] OR Merlot[Title/Abstract] OR Vitis[Title/Abstract] OR Raisins[Title/Abstract] OR Vitis [MeSH Terms]  ***Study design related terms***  Randomized [Title/Abstract] OR random[Title/Abstract] OR "Random allocation"[Title/Abstract] OR "Random assignment"[Title/Abstract] OR Intervention[Title/Abstract] OR "Clinical trial"[Title/Abstract] OR "Randomized controlled trial"[Title/Abstract] OR "Randomized controlled trials"[Title/Abstract] OR trial[tiab] OR Placebo [Title/Abstract] OR "Double-blind"[Title/Abstract] OR "Single-blind" [Title/Abstract] OR Clinical trial [Mesh] OR "Random Allocation" [Mesh] OR Randomised [Title/Abstract] OR "Randomised clinical trials"[Title/Abstract] OR "Randomised clinical trial"[Title/Abstract]) |

| **Table S2.** PICO criteria for inclusion and exclusion of trials | |
| --- | --- |
| ***Population*** | Adults (age of 18 years or more) regardless of health status |
| ***Intervention*** | Dietary and/or Table S grape or grape extract |
| ***Comparator*** | Placebo |
| ***Outcome*** | Serum inflammatory and antioxidant markers |
| ***Study design*** | Randomized placebo-controlled clinical trial with a cross-over or parallel design |
| ***Study duration*** | At least 2 weeks |

| **Table S3.** References of excluded studies with reasons for exclusion |
| --- |
| ***Grape seeds extract (n=6):*** |
| 1. Skarpanska-Stejnborn A, Basta P, Pilaczynska-Szczesniak L, Horoszkiewicz-Hassan M. BLACK GRAPE EXTRACT SUPPLEMENTATION ATTENUATES BLOOD OXIDATIVE STRESS IN RESPONSE TO ACUTE EXERCISE. Biology of Sport. 2010;27(1):41-6.  2. Palomares M, Perdomo N, Phung S, Stanczyk F, Synold T, Frankel P, et al. A phase I prevention trial of grape seed extract as a natural aromatase inhibitor in healthy post-menopausal women at risk for breast cancer. Cancer Research. 2009;69.  3. Dillon K, Shariffi B, Gillum T, Boyer W, Sullivan S, Kim JK. Effects of chronic dietary grape seed extract supplementation on aortic stiffness and hemodynamic responses in obese/overweight males during submaximal exercise. European Journal of Sport Science. 2021.  4. Chepulis L, Al-Aubaidy H, Page R. Effects of selected antioxidant food extracts on postprandial glucose responses in healthy individuals. Functional Foods in Health and Disease. 2016;6(8):493-505.  5. Semen KO, Weseler AR, Janssen MJW, Drittij-Reijnders MJ, Le Noble JLML, Bast A. Effects of monomeric and oligomeric flavanols on kidney function, inflammation and oxidative stress in runners: A randomized double-blind pilot study. Nutrients. 2020;12(6).  6. Alahyari E, Shahnavazi A, Alahyari E, Rigi K. IMPACT OF GRAPE SEED EXTRACT POWDER ON HEMOGLOBIN AND HEMATOCRIT LEVELS IN WOMEN AFTER VAGINAL DELIVERY. Pharmacophore. 2017;8(6). |
| ***Meeting abstract (n=2):*** |
| 1. Horne BD, Muhlestein JB, Gupta NC, Sukavaneshvar S, May HT, Lappe DL, et al. Randomized Double-Blind Parallel-Arm Placebo-Controlled 3-Month Trial of Purple Grape Juice for the Inhibition of Platelet Aggregation in Apparently Healthy People. Circulation. 2011;124(21).  2. Bays H, Schmitz K, Christian A, Ritchey M, Anderson JW. Raisins and Glucose: A Randomized, Controlled Trial. Diabetes. 2012;61:A580-A1. |
| ***Grape was not as an intervention (n=13):*** |
| 1. Törrönen R, Kolehmainen M, Sarkkinen E, Mykkänen H, Niskanen L. Postprandial glucose, insulin, and free fatty acid responses to sucrose consumed with blackcurrants and lingonberries in healthy women. The American journal of clinical nutrition. 2012;96(3):527-33.  2. Köchling J, Geis B, Wirth S, Hensel KO. Grape or grain but never the twain? A randomized controlled multiarm matched-Triplet crossover trial of beer and wine. American Journal of Clinical Nutrition. 2019;109(2):345-52.  3. Urquiaga I, D’Acuña S, Pérez D, Dicenta S, Echeverría G, Rigotti A, et al. Wine grape pomace flour improves blood pressure, fasting glucose and protein damage in humans: A randomized controlled trial. Biological Research. 2015;48.  4. Kuntz S, Kunz C, Herrmann J, Borsch CH, Abel G, Fröhling B, et al. Anthocyanins from fruit juices improve the antioxidant status of healthy young female volunteers without affecting anti-inflammatory parameters: results from the randomised, double-blind, placebo-controlled, cross-over ANTHONIA (ANTHOcyanins in Nutrition Investigation Alliance) study. The British journal of nutrition. 2014;112(6):925-36.  5. Tjelle TE, Holtung L, Bohn SK, Aaby K, Thoresen M, Wiik SA, et al. Polyphenol-rich juices reduce blood pressure measures in a randomised controlled trial in high normal and hypertensive volunteers. British Journal of Nutrition. 2015;114(7):1054-63.  6. Hokayem M, Blond E, Vidal H, Lambert K, Meugnier E, Feillet-Coudray C, et al. Grape polyphenols prevent fructose-induced oxidative stress and insulin resistance in first-degree relatives of type 2 diabetic patients. J Diabetes care. 2013;36(6):1454-61.  7. Torronen R, Hellstrom J, Mattila P, Kilpi K. Postprandial glycaemic response to berry nectars containing inverted sucrose. Journal of Nutritional Science. 2017;6.  8. Ohguro H, Ohguro I, Yagi S. Effects of Black Currant Anthocyanins on Intraocular Pressure in Healthy Volunteers and Patients with Glaucoma. Journal of Ocular Pharmacology and Therapeutics. 2013;29(1):61-7.  9. Yoshida K, Ohguro I, Ohguro H. Black Currant Anthocyanins Normalized Abnormal Levels of Serum Concentrations of Endothelin-1 in Patients with Glaucoma. Journal of Ocular Pharmacology and Therapeutics. 2013;29(5):480-7.  10. Deli CK, Poulios A, Georgakouli K, Papanikolaou K, Papoutsis A, Selemekou M, et al. The effect of pre-exercise ingestion of corinthian currant on endurance performance and blood redox status. Journal of Sports Sciences. 2018;36(19):2172-80.  11. Erickson J, Wang Q, Slavin J. White Grape Juice Elicits a Lower Breath Hydrogen Response Compared with Apple Juice in Healthy Human Subjects: A Randomized Controlled Trial. Journal of the Academy of Nutrition and Dietetics. 2017;117(6):908-13.  12. Pérez-Jiménez J, Serrano J, Tabernero M, Arranz S, Díaz-Rubio ME, García-Diz L, et al. Effects of grape antioxidant dietary fiber in cardiovascular disease risk factors. Nutrition. 2008;24(7-8):646-53.  13. Ohguro H, Ohguro I, Katai M, Tanaka S. Two-Year Randomized, Placebo-Controlled Study of Black Currant Anthocyanins on Visual Field in Glaucoma. Ophthalmologica. 2012;228(1):26-35. |
| ***Study protocol (n=1):*** |
| 1. Lee J, Torosyan N, Mallam S, Silverman D. Prospective randomized double-blinded longitudinal pilot study of effect of grapes on cerebral function. Journal of Nuclear Medicine. 2015;56(3). |
| ***Population from the same studies (n=2):*** |
| 1. Park YK, Kim JS, Kang MH. Concord grape juice supplementation reduces blood pressure in Korean hypertensive men: Double-blind, placebo controlled intervention trial. Biofactors. 2004;22(1-4):145-7.  2. Lu J, Alcantara A, Liu S, Varughese D, Silverman D. Examining the impact of grape consumption on brain metabolism in patients with mild decline in cognition: A double-blinded placebo controlled expansion study. Journal of Nuclear Medicine. 2020;61. |
| ***Short duration (n=9):*** |
| 1. Young JF, Dragsted LO, Daneshvar B, Lauridsen ST, Hansen M, Sandström B. The effect of grape-skin extract on oxidative status. British Journal of Nutrition. 2000;84(4):505-13.  2. Lekakis J, Rallidis LS, Andreadou I, Vamvakou G, Kazantzoglou G, Magiatis P, et al. Polyphenolic compounds from red grapes acutely improve endothelial function in patients with coronary heart disease. European Journal of Cardiovascular Prevention & Rehabilitation. 2005;12(6):596-600.  3. Sasot G, Martínez-Huélamo M, Vallverdú-Queralt A, Mercader-Martí M, Estruch R, Lamuela-Raventós RM. Identification of phenolic metabolites in human urine after the intake of a functional food made from grape extract by a high resolution LTQ-Orbitrap-MS approach. Food Research International. 2017;100:435-44.  4. Ahmed T, Sajid M, Singh T, Saini GS, Monif T, Saha N, et al. Influence of grape juice and orange juice on the pharmacokinetics and pharmacodynamics of diltiazem in healthy human male subjects. International Journal of Clinical Pharmacology and Therapeutics. 2008;46(10):511-8.  5. Hutchison AT, Flieller EB, Dillon KJ, Leverett BD. Black Currant Nectar Reduces Muscle Damage and Inflammation Following a Bout of High-Intensity Eccentric Contractions. Journal of Dietary Supplements. 2016;13(1):1-15.  6. Rietschier HL, Henagan TM, Earnest CP, Baker BL, Cortez CC, Stewart LK. SUN-DRIED RAISINS ARE A COST-EFFECTIVE ALTERNATIVE TO SPORTS JELLY BEANS IN PROLONGED CYCLING. Journal of Strength and Conditioning Research. 2011;25(11):3150-6.  7. Too BW, Cicai S, Hockett KR, Applegate E, Davis BA, Casazza GA. Natural versus commercial carbohydrate supplementation and endurance running performance. Journal of the International Society of Sports Nutrition. 2012;9.  8. Shin HS, Kindleysides S, Yip W, Budgett SC, Ingram JR, Poppitt SD. Postprandial effects of a polyphenolic grape extract (PGE) supplement on appetite and food intake: a randomised dose-comparison trial. Nutrition Journal. 2015;14.  9. Rotches-Ribalta M, Andres-Lacueva C, Estruch R, Escribano E, Urpi-Sarda M. Pharmacokinetics of resveratrol metabolic profile in healthy humans after moderate consumption of red wine and grape extract tablets. Pharmacological Research. 2012;66(5):375-82. |
| ***Conducted in children (n=1):*** |
| 1. Blair CK, Kelly AS, Steinberger J, Eberly LE, Napurski C, Robien K, et al. Feasibility and Preliminary Efficacy of the Effects of Flavanoid- Rich Purple Grape Juice on the Vascular Health of Childhood Cancer Survivors: A Randomized, Controlled Crossover Trial. Pediatric Blood & Cancer. 2014;61(12):2290-6. |
| ***Trials without control group (n=2):*** |
| 1. Rao AV, Shen H, Agarwal A, Yatcilla MT, Agarwal S. Bioabsorption and in vivo antioxidant properties of grape extract biovin((r)): a human intervention study. Journal of medicinal food. 2000;3(1):15-22.  2. Keevil JG, Osman HE, Reed JD, Folts JD. Grape juice, but not orange juice or grapefruit juice, inhibits human platelet aggregation. Journal of Nutrition. 2000;130(1):53-6. |
| ***Alcohol consumption considered as placebo group (n=5):*** |
| 1. Sierksma A, Vermunt SH, Lankhuizen IM, van der Gaag MS, Scheek LM, Grobbee DE, et al. Effect of moderate alcohol consumption on parameters of reverse cholesterol transport in postmenopausal women. Alcoholism, clinical and experimental research. 2004;28(4):662-6.  2. Flechtner-Mors M, Biesalski HK, Jenkinson CP, Adler G, Ditschuneit HH. Effects of moderate consumption of white wine on weight loss in overweight and obese subjects. International Journal of Obesity. 2004;28(11):1420-6.  3. McAnulty LS, Collier SR, Hubner ML, Anoufriev G, McAnulty SR. Chronic and acute effects of red wine versus red muscadine grape juice on body composition, blood lipids, vascular performance, inflammation, and antioxidant capacity in overweight adults. International Journal of Wine Research. 2019;11:13-22.  4. Agte VV, Pathare P, Nilegaonkar S, Tupe R, Adesara K, Mali A, et al. Effect of Phytonutrient Rich Juice Blends on Antioxidant Status and Lipid Profile in Young Adults: A Randomised Trial. Journal of Clinical and Diagnostic Research. 2018;12(2):BC6-BC10.  5. Terra X, Joosten MM, Schrieks IC, Hendriks HF. Effect of moderate alcohol consumption on fetuin-A levels in men and women: post-hoc analyses of three open-label randomized crossover trials. Nutrients. 2014;6(1):24. |
| ***Without relevant outcome (n=30):*** |
| 1. Nakaishi H, Matsumoto H, Tominaga S, Hirayama M. Effects of black current anthocyanoside intake on dark adaptation and VDT work-induced transient refractive alteration in healthy humans. Alternative medicine review : a journal of clinical therapeutic. 2000;5(6):553-62.  2. Aminian B, Massoompour SM, Sadeghalvaad A, Omrani GH. Unripe grape juice (verjuice) as a lipid-lowering agent: Fact or fiction. Archives of Iranian Medicine. 2003;6(1):32-4.  3. Mirheidary R, Saber SSE, Shaeiri MR, Fesharaki MG. The effect of "maviz" on memory improvement in university students: A randomized open-label clinical trial. Avicenna Journal of Phytomedicine. 2020;10(4):352-64.  4. Xiao Dong S, Zhi Ping Z, Zhong Xiao W, Chong Shu C, Fattore C, Gatti G, et al. Possible enhancement of the first-pass metabolism of phenacetin by ingestion of grape juice in Chinese subjects. British Journal of Clinical Pharmacology. 1999;48(4):638-40.  5. García-Díez E, Cuesta-Hervás M, Veses-Alcobendas AM. Acute supplementation with grapes in obese subjects did not affect postprandial metabolism: a randomized, double-blind, crossover clinical trial. European Journal of Nutrition. 2021;60(5):2671-81.  6. Haskell-Ramsay CF, Stuart RC, Okello EJ, Watson AW. Cognitive and mood improvements following acute supplementation with purple grape juice in healthy young adults. European Journal of Nutrition. 2017;56(8):2621-31.  7. Lee J, Torosyan N, Silverman DH. Examining the impact of grape consumption on brain metabolism and cognitive function in patients with mild decline in cognition: A double-blinded placebo controlled pilot study. Experimental Gerontology. 2017;87:121-8.  8. Coelho OGL, Alfenas RDG, Debelo H, Wightman JD, Ferruzzi MG, Mattes RD. Effects of Concord grape juice flavor intensity and phenolic compound content on glycemia, appetite and cognitive function in adults with excess body weight: a randomized double-blind crossover trial. Food & Function. 2021;12(22):11469-81.  9. Leniz A, Martinez-Maqueda D, Fernandez-Quintela A, Perez-Jimenez J, Portillo MP. Potential Relationship between the Changes in Circulating microRNAs and the Improvement in Glycaemic Control Induced by Grape Pomace Supplementation. Foods. 2021;10(9).  10. Ramos-Romero S, Martínez-Maqueda D, Hereu M, Amézqueta S, Torres JL, Pérez-Jiménez J. Modifications of gut microbiota after grape pomace supplementation in subjects at cardiometabolic risk: A randomized cross-over controlled clinical trial. Foods. 2020;9(9).  11. Lu J, Alcantara A, Liu S, Varughese D, Silverman D. y Examining Long-Term Impact of Grape Consumption on Brain Metabolism in Patients with Mild Decline in Cognition: a Double-Blind Placebo-Controlled Longitudinal Study. Journal of Nuclear Medicine. 2021;62.  12. Van Doren WW, Iqbal UH, Helmer DA, Litke DR, Simon JE, Wu Q, et al. Changes in polyphenol serum levels and cognitive performance after dietary supplementation with Concord grape juice in veterans with Gulf War Illness. Life sciences. 2021:119797.  13. Spettel S, Chughtai B, Feustel P, Kaufman A, Levin RM, De E. A prospective randomized double-blind trial of grape juice antioxidants in men with lower urinary tract symptoms. Neurourology and Urodynamics. 2013;32(3):261-5.  14. Ingersoll GL, Wasilewski A, Haller M, Pandya K, Bennett J, He H, et al. Effect of Concord Grape juice on Chemotherapy-Induced Nausea and Vomiting: Results of a Pilot Study. Oncology Nursing Forum. 2010;37(2):213-21.  15. Oliveira GS, Iraci L, Pinheiro GS, Casal MZ, Haas AN, Pochmann D, et al. Effect of exercise and grape juice on epigenetic modulation and functional outcomes in PD: A randomized clinical trial. Physiology & behavior. 2020;227:113135.  16. Barona J, Aristizabal JC, Blesso CN, Volek JS, Fernandez ML. Grape Polyphenols Reduce Blood Pressure and Increase Flow-Mediated Vasodilation in Men with Metabolic Syndrome. Journal of Nutrition. 2012;142(9):1626-32.  17. Bays H, Weiter K, Anderson J. A randomized study of raisins versus alternative snacks on glycemic control and other cardiovascular risk factors in patients with type 2 diabetes mellitus. Physician and Sportsmedicine. 2015;43(1):37-43.  18. Bays HE, Schmitz K, Christian A, Ritchey M, Anderson J. RAISINS AND BLOOD PRESSURE: A RANDOMIZED, CONTROLLED TRIAL. Journal of the American College of Cardiology. 2012;59(13):E1721-E.  19. Draijer R, De Graaf Y, Slettenaar M, De Groot E, Wright CI. Consumption of a polyphenol-rich grape-wine extract lowers ambulatory blood pressure in mildly hypertensive subjects. J Nutrients. 2015;7(5):3138-53.  20. Jiménez JP, Serrano J, Tabernero M, Arranz S, Díaz-Rubio ME, García-Diz L, et al. Effects of grape antioxidant dietary fiber in cardiovascular disease risk factors. J Nutrition. 2008;24(7-8):646-53.  21. Kokkou E, Siasos G, Georgiopoulos G, Oikonomou E, Verveniotis A, Vavuranakis M, et al. The impact of dietary flavonoid supplementation on smoking-induced inflammatory process and fibrinolytic impairment. Atherosclerosis. 2016;251:266-72.  22. Krikorian R, Nash TA, Shidler MD, Shukitt-Hale B, Joseph JA. Concord grape juice supplementation improves memory function in older adults with mild cognitive impairment. British Journal of Nutrition. 2010;103(5):730-4.  23. Lamport DJ, Lawton CL, Merat N, Jamson H, Myrissa K, Hofman D, et al. Concord grape juice, cognitive function, and driving performance: A 12-wk, placebo-controlled, randomized crossover trial in mothers of preteen children. American Journal of Clinical Nutrition. 2016;103(3):775-83.  24. Leal JB, Leal JB, Leal JBP, Borges YL, de Moura MIL, Teixeira-Araujo AA, et al. Grape juice and aerobic exercise on blood pressure. Nutrition and Food Science. 2020;50(5):987-98.  25. Neto MM, da Silva TF, de Lima FF, Siqueira TMQ, Toscano LT, de Moura SKMSF, et al. Whole Red Grape Juice Reduces Blood Pressure at Rest and Increases Post-exercise Hypotension. Journal of the American College of Nutrition. 2017;36(7):533-40.  26. Puglisi MJ, Mutungi G, Brun PJ, McGrane MM, Labonte C, Volek JS, et al. Raisins and walking alter appetite hormones and plasma lipids by modifications in lipoprotein metabolism and up-regulation of the low-density lipoprotein receptor. Metabolism-Clinical and Experimental. 2009;58(1):120-8.  27. Toscano LT, Tavares RL, Toscano LT, da Silva CSO, de Almeida AEM, Biasoto ACT, et al. Potential ergogenic activity of grape juice in runners. Applied Physiology, Nutrition and Metabolism. 2015;40(9):899-906.  28. Trzepizur W, Bironneau V, Recoquillon S, Priou P, Meslier N, Hamel JF, et al. Polyphenols Have No Impact on Endothelial Function in Patients with Obstructive Sleep Apnea: A Randomized Controlled Trial. Journal of Nutrition. 2018;148(4):581-6.  29. Vaisman N, Niv E. Daily consumption of red grape cell powder in a dietary dose improves cardiovascular parameters: a double blind, placebo-controlled, randomized study. International Journal of Food Sciences and Nutrition. 2015;66(3):342-9.  30. Zunino SJ, Keim NL, Kelley DS, Bonnel EL, Souza EC, Peerson JM. Increased cytokine production by monocytes from human subjects. who consumed grape powder was not mediated by differences in dietary intake patterns. Nutrition Research. 2017;40:32-9. |

**Table S4.** Risk of bias assessment according to the Cochrane criteria for the studies regarding effect of grape/grape products on inflammation and oxidative stress markers

| **Study First Author** | **Random sequence generation** | **Allocation concealment** | **Selective reporting** | **Blinding of participants and personnel** | **Blinding of outcome assessment** | **Incomplete outcome data** | **Quality** |
| --- | --- | --- | --- | --- | --- | --- | --- |
| Kanellos, 2013 | Low | Unclear | Low | Unclear | Low | Low | Poor |
| Kanellos, 2017 | Low | Low | Low | Low | Low | Low | Good |
| De Oliveira, 2021 | Low | Unclear | High | Unclear | Low | High | Poor |
| Castilla, 2006 | Unclear | Unclear | Low | Unclear | Unclear | Low | Poor |
| Castilla, 2008 | Unclear | Unclear | Low | Unclear | Unclear | Low | Poor |
| Rahbar, 2015 | Unclear | Unclear | Low | Unclear | Unclear | Unclear | Poor |
| Tome´-Carneiro, 2013 | Low | Low | Low | Low | Low | Low | Good |
| Vaisman, 2015 | Low | Low | Low | Low | Low | Low | Good |
| Zunino, 2014 | Unclear | Low | Low | Low | Low | High | Poor |
| Rankin, 2008 | Unclear | Unclear | Low | Unclear | Unclear | High | Poor |
| Shishehbor, F | Unclear | Unclear | Low | Unclear | Unclear | Low | Poor |
| Amoutzopoulos, 2013 | Unclear | Unclear | Low | Unclear | Unclear | High | Poor |
| Dohadwala, 2010 | Low | Low | Low | Low | Low | High | Fair |
| Bardagjy, 2018 | Unclear | Low | Low | Low | Low | Unclear | Poor |
| Goulart, 2020 | Low | Low | Low | Low | Low | Low | Good |
| Barona, 2012 | Unclear | Unclear | High | Low | Low | Low | Poor |
| Zern, 2005 | Unclear | Unclear | Low | Unclear | Unclear | Low | Poor |
| Yubero, 2013 | Unclear | Unclear | Low | Low | Low | Low | Poor |
| Puglisi, 2008 | Unclear | Unclear | High | Unclear | Unclear | Low | Poor |
| Rowe, 2011 | Low | Low | Low | Low | Low | Low | Good |
| Kaliora, 2016 | Low | Unclear | Low | Unclear | Low | High | Poor |
| Dani, 2020 | Low | Low | Low | Low | Low | Low | Good |
| Corredor, 2016 | Unclear | Unclear | Low | Unclear | Unclear | Low | Poor |
| Duclos, 2017 | Unclear | Unclear | Low | Low | Low | High | Poor |
| Evans, 2014 | Low | Low | Low | Low | Low | Low | Good |
| Hollis, 2019 | Unclear | Unclear | Low | Low | Low | Low | Poor |
| Lafay, 2009 | Low | Low | Low | Low | Low | Low | Good |
| Martínez-Maqueda, 2018 | Unclear | Unclear | Low | Unclear | Unclear | Low | Poor |
| Toscano, (2017) | Unclear | Unclear | Low | Unclear | Unclear | Unclear | Poor |

Good quality, all criteria met; Fair quality, one criterion not met (i.e. high risk of bias for one domain) or two criteria unclear; Poor quality, two or more criteria listed as high or unclear risk of bias.

| **Table S5.** Assessing the quality of evidence regarding effect of grape/whole grape products on oxidative stress and inflammatory markers by the GRADE system. | | | | | | | |
| --- | --- | --- | --- | --- | --- | --- | --- |
| **Outcome** | **Study/ Participants (n/n)** | **Risk of bias** | **Inconsistency** | **Indirectness** | **imprecision** | **Publication bias** | **Certainty** |
| ***Oxidative stress markers*** | | | | | | | |
| Carbonyl (nmol/mg) | 3/ 64 | Not serious | Serious1 | Serious2 | Serious3 | NA | Very low |
| Catalase (U CAT/mg protein) | 3/ 64 | Not serious | Not serious (I2=0%) | Serious2 | Serious3 | NA | Low |
| LDL-Ox (U/L) | 10/ 385 | Serious4 | Serious5 | Not serious | Serious3 | Not serious | Very low |
| MDA (µmol/l) | 4/ 193 | Serious6 | Serious7 | Serious2 | Serious3 | NA | Very low |
| ORAC (µmol/l TE) | 5/ 206 | Serious8 | Not serious (I2=35.6%) | Not serious | Serious3 | NA | Low |
| SOD (U SOD/mg of protein) | 3/ 64 | Not serious | Very serious9 | Serious2 | Serious3 | NA | Very low |
| TBARS (nmol/mg) | 5/ 153 | Serious10 | Not serious (I2=34.2%) | Not serious | Serious3 | NA | Low |
| TAC (µmol/l) | 4/ 224 | Serious11 | Serious12 | Serious2 | Serious3 | NA | Very low |
| ***Inflammatory markers*** | | | | | | | |
| Hs-CRP (mg/L) | 15/ 695 | Serious13 | Not serious (I2=0%) | Not serious | Serious3 | Not serious | Low |
| IL-6 (pg/ml) | 10/ 310 | Serious14 | Not serious (I2=0%) | Not serious | Serious3 | Not serious | Low |
| TNF-α (pg/ml) | 10/ 310 | Serious15 | Serious16 | Not serious | Serious3 | Not serious | Very low |
| MCP-1 (pg/ml) | 3/ 55 | Serious17 | Not serious (I2=0%) | Serious2 | Serious3 | NA | Very low |

Explanation

1. I2=78, P heterogeneity< 0.001. The sensitivity analysis did not explain the source of heterogeneity. Downgraded.
2. The number of included trials were less or equal to 5. Downgraded.
3. The sample size did not reach the optimal information size (N ≤ 800). Downgraded.
4. Most of trials (8 of 10) were at unclear and low quality. Main trial limitations were lack of random sequence generation, allocation concealment, and personnel and blinding of outcome assessment. Downgraded.
5. I2=63.7, P heterogeneity= 0.003. The predefined subgroups and sensitivity analysis did not explain the source of heterogeneity. Downgraded.
6. Most of trials (3 of 4) were at low quality. Main trial limitations were lack of random sequence generation, allocation concealment, and personnel and blinding of outcome assessment. Downgraded.
7. I2=56.5, P heterogeneity= 0.07. The sensitivity analysis did not explain the source of heterogeneity. Downgraded.
8. Most of trials (3 of 5) were at unclear and low quality. Main trial limitations were lack of random sequence generation, allocation concealment, and personnel and blinding of outcome assessment. Downgraded.
9. I2=93.5, P heterogeneity <0.001. The sensitivity analysis did not explain the source of heterogeneity. Downgraded.
10. Most of trials (3 of 5) were at unclear and low quality. Main trial limitations were lack of random sequence generation, allocation concealment, and personnel and blinding of outcome assessment. Downgraded.
11. Most of trials (3 of 4) were at low quality. Main trial limitations were lack of random sequence generation, allocation concealment, and personnel and blinding of outcome assessment. Downgraded.
12. I2=55.2, P heterogeneity <0.001. The sensitivity analysis did not explain the source of heterogeneity. Downgraded.
13. Most of trials (13 of 15) were at unclear and low quality. Main trial limitations were lack of random sequence generation, allocation concealment, and personnel and blinding of outcome assessment. Downgraded.
14. Most of trials (8 of 10) were at unclear and low quality. Main trial limitations were lack of random sequence generation, allocation concealment, and personnel and blinding of outcome assessment. Downgraded
15. Most of trials (8 of 10) were at unclear and low quality. Main trial limitations were lack of random sequence generation, allocation concealment, and personnel and blinding of outcome assessment. Downgraded.
16. I2=70.8, P heterogeneity <0.001. The predefined subgroups and sensitivity analysis did not explain the source of heterogeneity. Downgraded.
17. All of included trials were at unclear and low quality.
18. All of included trials were at unclear and low quality.

| **Table S6.** Subgroup analysis to assess effect of grape/whole grape products on high-sensitivity C-reactive protein (hs-CRP) levels. | | | | | | | |
| --- | --- | --- | --- | --- | --- | --- | --- |
| Outcome | Num. studies | Meta-analysis | | Heterogeneity | | | |
| WMD (95% CI) | P effect | Q statistic | P within heterogeneity | I2 (%) | P Between heterogeneity |
| **Study design** |  |  |  |  |  |  | 0.18 |
| Parallel | 9 | 0.28 (-0.23, 0.80) | 0.28 | 5.10 | 0.75 | 0 |  |
| Cross-over | 6 | -0.11 (-0.39, 0.16) | 0.42 | 6.74 | 0.35 | 11 |  |
| **Sex** |  |  |  |  |  |  | 0.38 |
| Both | 14 | -0.01 (-0.14, 0.12) | 0.88 | 12.38 | 0.50 | 0 |  |
| Female | 1 | -0.79 (-2.52, 0.95) | 0.37 | 0 | - | - |  |
| **Study duration (week)** |  |  |  |  |  |  | 0.24 |
| < 12 | 10 | -0.03 (-0.16, 0.09) | 0.64 | 8.11 | 0.62 | 0 |  |
| ≥12 | 5 | 0.33 (-0.26, 0.91) | 0.27 | 3.73 | 0.44 | 0 |  |
| **Study location** |  |  |  |  |  |  | 0.21 |
| Asia | 1 | -0.1 (-1.46, 1.26) | 0.88 | 0 | - | - |  |
| Europe | 8 | 0.01 (-0.11, 0.15) | 0.78 | 5.05 | 0 | 0.0 |  |
| South US | 1 | 4.3 (-3.61, 12.21) | 0.28 | 0 | - | - |  |
| US | 5 | -0.43 (-0.9, 0.03) | 0.06 | 3.68 | 0 | 0.0 |  |
| **Type of intervention** |  |  |  |  |  |  | 0.15 |
| Fresh Grape | _ | _ | _ | _ | _ | _ | 0.03 |
| Dried Grape (pomace, raisin, powder) | 10 | 0.02 (-0.11, 0.16) | 0.72 | 6.61 | 0.76 | 0 |  |
| Grape Extract (juice, concentrate, Extract) | 5 | -0.52 (-0.99, -0.04) | 0.03 | 1.98 | 0.74 | 0 |  |
| **Health status** |  |  |  |  |  |  | 0.27 |
| CVD | 4 | -0.41 (-0.85, 0.02) | 0.06 | 2.58 | 0.46 | 0 |  |
| Healthy | 6 | 0.14 (-0.81, 1.10) | 0.77 | 4.11 | 0.66 | 0 |  |
| Hemodialysis | 2 | 2.60 (-6.31, 11.50) | 0.57 | 0.07 | 0.80 | 0 |  |
| Metabolic syndrome | 3 | 0.12 (-0.24, 0.49) | 0.51 | 2.59 | 0.27 | 22.9 |  |
| **Dose (mg/d)** |  |  |  |  |  |  | 0.92 |
| <150 | 13 | 0.02 (-0.11, 0.15) | 0.80 | 8.05 | 0.84 | 0 |  |
| ≥150 | 2 | 0.20 (-3.19, 3.60) | 0.91 | 1.42 | 0.23 | 29.7 |  |
| **Quality** |  |  |  |  |  |  | 0.89 |
| Unclear | 4 | 0.26 (-0.83, 1.35) | 0.64 | 8.17 | 0.04 | 63.3 |  |
| Low | 8 | -0.001 (-0.13, 0.13) | 0.99 | 2.57 | 0.96 | 0 |  |
| High | 3 | -0.03 (-0.92, 0.85) | 0.94 | 2.05 | 0.36 | 2.5 |  |

| **Table S7.** Subgroup analysis to assess effect of grape/whole grape products on tumor necrosis factor alpha (TNF-α) levels. | | | | | | | |
| --- | --- | --- | --- | --- | --- | --- | --- |
| Outcome | Num. studies | Meta-analysis | | Heterogeneity | | | |
| WMD (95% CI) | P effect | Q statistic | P within heterogeneity | I2 (%) | P Between heterogeneity |
| **Study design** |  |  |  |  |  |  | 0.31 |
| Parallel | 4 | 0.13 (-0.43, 0.68) | 0.65 | 30.38 | <0.001 | 90.1 |  |
| Cross-over | 6 | -0.17 (-0.32, -0.02) | 0.03 | 3.41 | 0.76 | 0 |  |
| **Sex** |  |  |  |  |  |  | 0.49 |
| Both | 7 | 0.03 (-0.27, 0.34) | 0.84 | 31.06 | <0.001 | 80.7 |  |
| Female | 2 | -0.23 (-0.56, 0.09) | 0.16 | 0.61 | 0.74 | 0 |  |
| Male | 2 | -0.03 (-0.36, 0.29) | 0.84 | 1.13 | 0.29 | 11.3 |  |
| **Study duration (week)** |  |  |  |  |  |  | 0.45 |
| < 12 | 7 | -0.16 (-0.24, -0.09) | <0.001 | 3.42 | 0.84 | 0 |  |
| ≥12 | 3 | 0.23 (-0.78, 1.25) | 0.65 | 19.95 | <0.001 | 90 |  |
| **Study location** |  |  |  |  |  |  | 0.31 |
| Asia | - | - | - | - | - | - |  |
| Europe | 4 | 0.12 (-0.42, 0.68) | 0.65 | 30.38 | 0 | 90.12 |  |
| South US | - | - | - | - | - | - |  |
| US | 6 | -0.16 (-0.31, -0.01) | 0.03 | 3.41 | 0.75 | 0.0 |  |
| **Type of intervention** |  |  |  |  |  |  | 0.35 |
| Fresh Grape | _ | _ | _ | _ | _ | _ | 0.36 |
| Dried Grape (pomace, raisin, powder) | 8 | -0.02 (-0.31, 0.28) | 0.91 | 31.81 | <0.001 | 74.8 |  |
| Grape Extract (juice, concentrate, Extract) | 2 | -0.16 (-0.25, -0.07) | <0.001 | 0.27 | 0.61 | 0 |  |
| **Health status** |  |  |  |  |  |  | 0.58 |
| CVD | 1 | -1.00 (-4.20, 2.20) | 0.54 | 0 | _ | _ |  |
| Healthy | 5 | -0.16 (-0.24, -0.09) | <0.001 | 0.36 | 0.99 | 0 |  |
| Metabolic syndrome | 4 | 0.10 (-0.47, 0.67) | 0.72 | 26.35 | <0.001 | 88.6 |  |
| **Dose (mg/d)** |  |  |  |  |  |  | 0.98 |
| <150 | 9 | -0.04 (-0.26, 0.17) | 0.69 | 34.2 | <0.001 | 73.7 |  |
| ≥150 | 1 | -0.02 (-2.01, 1.97) | 0.98 | 0 | - | - |  |
| **Quality** |  |  |  |  |  |  | 0.56 |
| Unclear | 2 | -0.18 (-0.39, 0.02) | 0.08 | 0.25 | 0.62 | 0 |  |
| Low | 6 | 0.02 (-0.33, 0.37) | 0.91 | 33 | <0.001 | 81.8 |  |
| High | 2 | -0.21 (-0.53, 0.11) | 0.20 | 0.24 | 0.63 | 0 |  |

| **Table S8.** Subgroup analysis to assess effect of grape/whole grape products on interleukin 6 (IL-6) levels. | | | | | | | |
| --- | --- | --- | --- | --- | --- | --- | --- |
| Outcome | Num. studies | Meta-analysis | | Heterogeneity | | | |
| WMD (95% CI) | P effect | Q statistic | P within heterogeneity | I2 (%) | P Between heterogeneity |
| **Study design** |  |  |  |  |  |  | 0.94 |
| Parallel | 4 | 0.08 (-3.14, 3.31) | 0.96 | 0.09 | 0.99 | 0 |  |
| Cross-over | 6 | -0.04 (-0.44, 0.36) | 0.85 | 0.29 | 0.99 | 0 |  |
| **Sex** |  |  |  |  |  |  | 0.97 |
| Both | 6 | 0.06 (-1.89, 2.01) | 0.96 | 0.07 | 0.99 | 0 |  |
| Female | 3 | 0.02 (-0.41, 0.45) | 0.94 | 0.52 | 0.91 | 0 |  |
| Male | 2 | -0.08 (-0.75, 0.58) | 0.81 | 0.47 | 0.49 | 0 |  |
| **Study duration (week)** |  |  |  |  |  |  | 0.91 |
| < 12 | 7 | -0.04 (-0.44, 0.36) | 0.84 | 0.32 | 0.99 | 0 |  |
| ≥12 | 3 | 0.16 (-3.15, 3.46) | 0.93 | 0.06 | 0.97 | 0 |  |
| **Study location** |  |  |  |  |  |  | 0.97 |
| Asia | - | - | - | - | - | - | - |
| Europe | 3 | 0.15 (-3.15, 3.46) | 0.92 | 0.06 | 0.97 | 0 |  |
| South US | 1 | -1.28 (-15.36, 12.8) | 0.85 | - | 0 | - |  |
| US | 6 | -0.04 (-0.44, 0.36) | 0.84 | 0.29 | 1.0 | 0 |  |
| **Type of intervention** |  |  |  |  |  |  | 0.93 |
| Fresh Grape | - | - | - | - | - | - |  |
| Dried Grape (pomace, raisin, powder) | 8 | -0.04 (-0.44, 0.36) | 0.85 | 0.36 | 1.00 | 0 |  |
| Grape Extract (juice, concentrate, Extract) | 2 | -0.27 (-5.67, 5.12) | 0.92 | 0.02 | 0.88 | 0 |  |
| **Health status** |  |  |  |  |  |  | 0.99 |
| CVD | 1 | -0.10 (-5.94, 5.74) | 0.97 | 0 | _ | _ |  |
| Healthy | 5 | -0.06 (-0.56, 0.44) | 0.82 | 0.24 | 0.99 | 0 |  |
| Metabolic syndrome | 4 | -0.01 (-0.67, 0.66) | 0.99 | 0.13 | 0.99 | 0 |  |
| **Dose (mg/d)** |  |  |  |  |  |  | 0.86 |
| <150 | 9 | -0.04 (-0.43, 0.36) | 0.86 | 0.36 | 0.99 | 0 |  |
| ≥150 | 1 | -1.28 (-15.37, 12.81) | 0.86 | 0 | - | - |  |
| **Quality** |  |  |  |  |  |  | 0.99 |
| Unclear | 3 | 0.14 (-2.52, 2.80) | 0.92 | 0.05 | 0.98 | 0 |  |
| Low | 5 | -0.04 (-0.45, 0.36) | 0.84 | 0.29 | 0.99 | 0 |  |
| High | 2 | -0.27 (-5.67, 5.12) | 0.92 | 0.02 | 0.88 | 0 |  |

| **Table S 9.** Subgroup analysis to assess effect of grape/whole grape products on oxidized low-density lipoprotein (Ox-LDL) levels. | | | | | | | |
| --- | --- | --- | --- | --- | --- | --- | --- |
| Outcome | Num. studies | Meta-analysis | | Heterogeneity | | | |
| WMD (95% CI) | P effect | Q statistic | P within heterogeneity | I2 (%) | P Between heterogeneity |
| **Study design** |  |  |  |  |  |  | <0.001 |
| Parallel | 7 | -6.42 (-7.31, -5.54) | <0.001 | 4.87 | 0.56 | 0 |  |
| Cross-over | 3 | 0.75 (-2.27, 3.78) | 0.63 | 0.04 | 0.98 | 0 |  |
| **Sex** |  |  |  |  |  |  | 0.60 |
| Both | 9 | -3.32 (-6.85, 0.21) | 0.07 | 24.23 | 0.002 | 67 |  |
| Male | 1 | 2.80 (-19.64, 25.24) | 0.81 | 0 | - | - |  |
| **Study duration (week)** |  |  |  |  |  |  | 0.52 |
| < 12 | 7 | -3.61 (-7.66, 0.43) | 0.08 | 22.95 | 0.001 | 73.9 |  |
| ≥12 | 3 | -0.92 (-8.12, 6.28) | 0.80 | 0.03 | 0.99 | 0 |  |
| **Study location** |  |  |  |  |  |  | <0.001 |
| Asia | - | - | - | - | - | - |  |
| Europe | 7 | -6.43 (-7.32, -5.54) | <0.001 | 5.04 | 0.53 | 0 |  |
| South US | - | - | - | - | - | - |  |
| US | 3 | 0.5 (-2.44, 3.45) | 0.73 | 0.28 | 0.87 | 0 |  |
| **Type of intervention** |  |  |  |  |  |  | 0.66 |
| Fresh Grape | - | - | - | - | - | - |  |
| Dried Grape (pomace, raisin, powder) | 4 | 0.54 (-2.37, 3.44) | 0.72 | 0.17 | 0.98 | 0 |  |
| Grape Extract (juice, concentrate, Extract) | 6 | -6.46 (-7.35, -5.57) | <0.001 | 4.27 | 0.51 | 0 |  |
| **Health status** |  |  |  |  |  |  | 0.08 |
| CVD | 2 | -1.48 (-9.49, 6.52) | 0.72 | 0.05 | 0.83 | 0 |  |
| Healthy | 4 | -1.74 (-7.22, 3.74) | 0.53 | 19.82 | <0.001 | 84.9 |  |
| Hemodialysis | 2 | -10.25 (-15.42, -5.07) | <0.001 | 0.02 | 0.89 | 0 |  |
| Metabolic syndrome | 2 | -1.14 (-10.50, 8.22) | 0.81 | 0.02 | 0.89 | 0 |  |
| **Dose (mg/d)** |  |  |  |  |  |  | - |
| <150 | 10 | -3.19 (-6.64, 0.25) | 0.07 | 24.81 | 0.003 | 63.7 |  |
| ≥150 | - | - | - | - | - | - |  |
| **Quality** |  |  |  |  |  |  | <0.001 |
| Unclear | 4 | 0.54 (-2.31, 3.39) | 0.71 | 0.11 | 0.99 | 0 |  |
| Low | 4 | -6.52 (-7.42, -5.63) | <0.001 | 2.30 | 0.51 | 0 |  |
| High | 2 | -1.32 (-11.46, 8.81) | 0.80 | 0.16 | 0.69 | 0 |  |

| **Table S10.** Subgroup analysis to assess effect of grape/whole grape products on inflammatory and oxidative stress markers using DerSimonian-Laird and Hartung-Knapp-Sidik-Jonkman methods | | | | | | |
| --- | --- | --- | --- | --- | --- | --- |
| Outcome | Num. studies | Meta-analysis | | Heterogeneity | | |
| WMD (95% CI) | P effect | Q statistic | P within heterogeneity | I2 (95% CI) |
| **DerSimonian-Laird method** | | | | | | |
| Hs-CRP (mg/L) | 15 | -0.01 (-0.14, 0.11) | 0.82 | 13.22 | 0.59 | 0.0 (0, 52) |
| IL-6 (pg/ml) | 10 | -0.04 (-0.44, 0.36) | 0.85 | 0.39 | 0.99 | 0.0 (0, 60) |
| TNF-α (pg/ml) | 10 | -0.04 (-0.25, 0.17) | 0.68 | 34.21 | <0.001 | 70.8 (46, 84) |
| MCP-1 (pg/ml) | 3 | -4.96 (-14.04, 4.13) | 0.28 | 1.39 | 0.5 | 0.0 (0, 90) |
| TAC (µmol/l) | 4 | 62.48 (31.62, 93.33) | <0.001 | 6.7 | 0.08 | 55.2 (0, 85) |
| LDL-ox (U/L) | 10 | -3.19 (-6.64, 0.25) | 0.07 | 24.81 | 0.003 | 63.7 (28, 82) |
| ORAC (µmol/l TE) | 5 | 90.06 (35.97, 144.15) | 0.001 | 6.21 | 0.18 | 35.6 (0, 76) |
| CAT (U CAT/mg pro) | 3 | 5.49 (4.76, 6.22) | <0.001 | 0.03 | 0.98 | 0.0 (0, 90) |
| SOD (U SOD/mg of pro) | 3 | 4.95 (-0.14, 10.04) | 0.06 | 30.72 | <0.001 | 93.5 (84, 97) |
| Carbonyl (nmol/mg) | 3 | -3.27 (-18.30, 11.77) | 0.67 | 15.4 | <0.001 | 87 (63, 95) |
| MDA (µmol/l) | 4 | -0.09 (-0.50, 0.33) | 0.68 | 6.89 | 0.07 | 56.5 (0, 86) |
| TBARS (nmol/mg) | 5 | -0.17 (-0.31, -0.03) | 0.02 | 6.08 | 0.19 | 34.2 (0, 75) |
| **Hartung-Knapp-Sidik-Jonkman method** | | | | | | |
| Hs-CRP (mg/L) | 15 | 0.09 (-0.5, 0.68) | 0.75 | 13.22 | 0.58 | 70.16 |
| IL-6 (pg/ml) | 10 | -0.03 (-0.44, 0.37) | 0.85 | 0.39 | 1.00 | 0.85 |
| TNF-α (pg/ml) | 10 | -0.04 (-0.29, 0.2) | 0.73 | 34.21 | 0.0002 | 79.4 |
| MCP-1 (pg/ml) | 3 | -4.63 (-15.34, 6.07) | 0.39 | 1.39 | 0.49 | 15.54 |
| TAC (µmol/l) | 4 | 62.8 (33.0, 92.16) | <0.001 | 6.7 | 0.08 | 52.64 |
| LDL-ox (U/L) | 10 | -3.28 (-6.47, -0.09) | 0.04 | 24.81 | 0.003 | 57.84 |
| ORAC (µmol/l TE) | 5 | 90.96 (15.38, 166.53) | 0.01 | 6.21 | 0.18 | 61.37 |
| CAT (U CAT/mg pro) | 3 | 5.49 (4.75, 6.23) | <0.001 | 0.03 | 0.98 | 0.01 |
| SOD (U SOD/mg of pro) | 3 | 5.02 (1.10, 8.94) | 0.01 | 30.72 | 0.0 | 88.75 |
| Carbonyl (nmol/mg) | 3 | -3.6 (-20.67, 13.43) | 0.67 | 15.4 | 0.0005 | 89.96 |
| MDA (µmol/l) | 4 | -0.03 (-0.54, 0.47) | 0.9 | 6.89 | 0.07 | 70.3 |
| TBARS (nmol/mg) | 5 | -0.08 (-0.34, 0.17) | 0.5 | 6.08 | 0.19 | 74.11 |

Hs-CRP, High-Sensitivity C-Reactive Protein; IL-6, Interleukin 6; TNF-α, Tumor necrosis factor-α; MCP-1, Monocyte Chemoattractant Protein-1; TAC, Total antioxidant capacity; LDL-ox, Oxidized Low-Density Lipoprotein; ORAC, Oxygen Radical Absorbance Capacity; CAT, Catalase; SOD, superoxide dismutase; MDA, Malondialdehyde; TBARS, Thiobarbituric acid reactive substance.

**Table S11.** Meta-regression analysis of potential source of heterogeneity.

| **Variable** | **Hs-CRP** | | | **TNF-alpha** | | | **IL-6** | | | **LDL-OX** | | |
| --- | --- | --- | --- | --- | --- | --- | --- | --- | --- | --- | --- | --- |
|  | ***Beta*** | ***CIs*** | ***P-value*** | ***Beta*** | ***CIs*** | ***P-value*** | ***Beta*** | ***CIs*** | ***P-value*** | ***Beta*** | ***CIs*** | ***P-value*** |
| Duration | 0.006 | -0.02, 0.02 | 0.95 | 0.02 | -0.01, 0.04 | 0.07 | 0.003 | -0.1. 0.1 | 0.95 | 0.11 | -0.35, 0.58 | 0.63 |
| Dose | -0.18 | -0.97. 0.23 | 0.13 | -0.17 | -0.32, 0.82 | 0.2 | -0.03 | -1.29, 1.2 | 0.96 | 2.47 | -0.48, 4.47 | 0.42 |
